# Supplementary material for: Evolution of meiotic recombination genes in maize and teosinte
Source: PubMed Central journal article supplement (PMC5267385; doi:10.1186/s12864-017-3486-z), 2017-01-25
Supplement: 12864_2017_3486_MOESM1_ESM.pdf [file 12864_2017_3486_MOESM1_ESM.pdf]

**Table S1.** Maize genes encoding key meiotic recombination proteins.

| Gene           | Coding sequence length | ORF length           | Chromosome/bin | Number of related pseudogenes <sup>a</sup> |
|----------------|------------------------|----------------------|----------------|--------------------------------------------|
| <i>Dmc1</i>    | 1035bp                 | 4059bp               | 3/09           | 12                                         |
| <i>Mlh1</i>    | 2178bp                 | 6869bp               | 8/06           | 4                                          |
| <i>Mre11A</i>  | 2121bp                 | 4867bp               | 2/02           | -                                          |
| <i>Mre11B</i>  | 2019bp                 | 5389bp               | 4/04           | -                                          |
| <i>Msh4</i>    | 2415bp                 | 51074bp              | 2/06           | -                                          |
| <i>Mus81-1</i> | 1353bp                 | 3409bp               | 3/05           | -                                          |
| <i>Rad51A1</i> | 1023bp                 | 3589bp               | 7/04           | -                                          |
| <i>Rad51A2</i> | 1023bp                 | 2815bp               | 3/05           | -                                          |
| <i>Recq4</i>   | 3528bp                 | 12455bp              | 5/04           | -                                          |
| <i>Spo11-1</i> | 1152bp                 | 4316bp               | 5/01           | -                                          |
| <i>Spo11-2</i> | 1149bp                 | >2513bp <sup>b</sup> | 4/04           | 1                                          |

<sup>a</sup> The pseudogenes are truncated fragments of the full-length gene integrated in different genomic locations.

<sup>b</sup> Actual ORF length unknown because of a genome assembly gap in intron 7.

**Table S2.** Accession numbers for sequences from GenBank used in the phylogenetic analysis of recombination genes.

| Protein                        | Species                                          | GenBank source                                     |
|--------------------------------|--------------------------------------------------|----------------------------------------------------|
| DMC1                           | <i>Saccharomyces cerevisiae</i>                  | NP_011106.1                                        |
|                                | <i>Homo sapiens</i>                              | NP_008999.2                                        |
|                                | <i>Arabidopsis thaliana</i>                      | NP_188928                                          |
|                                | <i>Oryza sativa</i> DMC1A                        | AAM76793.1                                         |
|                                | <i>Oryza sativa</i> DMC1B                        | NP_001065738.1                                     |
|                                | <i>Zea mays</i>                                  | NP_001141379.1                                     |
| MLH1                           | <i>Saccharomyces cerevisiae</i>                  | AAA16835.1                                         |
|                                | <i>Homo sapiens</i>                              | NP_005582.1                                        |
|                                | <i>Physcomitrella patens</i> 126125              | XP_001763041.1                                     |
|                                | <i>Arabidopsis thaliana</i>                      | NP_567345.2                                        |
|                                | <i>Oryza sativa</i>                              | NP_001045457.1                                     |
| MRE11                          | <i>Saccharomyces cerevisiae</i>                  | AAB61454.1                                         |
|                                | <i>Homo sapiens</i>                              | NP_005582.1                                        |
|                                | <i>Physcomitrella patens</i>                     | XP_001755538.1                                     |
|                                | <i>Arabidopsis thaliana</i>                      | NP_200237.1                                        |
|                                | <i>Oryza sativa</i> MRE11A                       | NP_001054012.1                                     |
|                                | <i>Oryza sativa</i> MRE11B                       | BAD03045.1                                         |
|                                | <i>Zea mays</i> MRE11A                           | ABQ59303.1                                         |
| <i>Zea mays</i> MRE11B         | NP_001106049.1                                   |                                                    |
| MSH4                           | <i>Saccharomyces cerevisiae</i>                  | P40965                                             |
|                                | <i>Homo sapiens</i>                              | AAB72039.1                                         |
|                                | <i>Physcomitrella patens</i> 145361              | XP_001777754.1                                     |
|                                | <i>Arabidopsis thaliana</i>                      | NP_193469.2                                        |
|                                | <i>Oryza sativa</i>                              | NM_001066195.1,<br>conceptually spliced and edited |
| MUS81                          | <i>Saccharomyces cerevisiae</i>                  | NP_010674.1                                        |
|                                | <i>Homo sapiens</i>                              | NP_079404.3                                        |
|                                | <i>Physcomitrella patens</i> 176090              | XP_001754940.1                                     |
|                                | <i>Arabidopsis thaliana</i>                      | NP_194816.2                                        |
|                                | <i>Oryza sativa</i>                              | NP_001045390.1                                     |
|                                | <i>Sorghum bicolor</i> MUS81-1                   | sorghum genome sequence,<br>conceptually spliced   |
| <i>Sorghum bicolor</i> MUS81-2 | sorghum genome sequence,<br>conceptually spliced |                                                    |
| RAD51                          | <i>Saccharomyces cerevisiae</i>                  | NP_011021.1                                        |
|                                | <i>Homo sapiens</i>                              | NP_002866.2                                        |
|                                | <i>Physcomitrella patens</i> RAD51A              | CAC86603.1                                         |
|                                | <i>Physcomitrella patens</i> RAD51B              | CAC86604.1                                         |
|                                | <i>Arabidopsis thaliana</i>                      | NP_568402.1                                        |
|                                | <i>Oryza sativa</i> RAD51A1                      | BAB85491.1                                         |

|       |                                        |                                                  |
|-------|----------------------------------------|--------------------------------------------------|
|       | <i>Oryza sativa</i> RAD51A2            | NP 001066806.1                                   |
|       | <i>Zea mays</i> RAD51A1                | NP 001104918.1                                   |
|       | <i>Zea mays</i> RAD51A2                | NP 001104919.1                                   |
| SGS1/ | <i>Saccharomyces cerevisiae</i>        | NP 013915.1                                      |
| RECQ4 | <i>Homo sapiens</i>                    | AAI07424.1                                       |
|       | <i>Physcomitrella patens</i> 132154    | XP 001767449.1                                   |
|       | <i>Physcomitrella patens</i> 1048      | XP 001778692.1                                   |
|       | <i>Arabidopsis thaliana</i> RECQ4A     | NP 172562.2                                      |
|       | <i>Arabidopsis thaliana</i> RECQ4B     | NP 176289.6                                      |
|       | <i>Oryza sativa</i>                    | AK242898.1                                       |
| SPO11 | <i>Sulfolobus acidocaldarius</i> TOP6A | YP 255943.1                                      |
|       | <i>Giardia intestinalis</i>            | XP 001706588.1                                   |
|       | <i>Saccharomyces cerevisiae</i>        | NP 011841.1                                      |
|       | <i>Neurospora crassa</i>               | CAB88597.1                                       |
|       | <i>Coprinus cinereus</i>               | AAF26720.1                                       |
|       | <i>Schizosaccharomyces pombe</i>       | NP 593479.1                                      |
|       | <i>Homo sapiens</i>                    | NP 036576.1                                      |
|       | <i>Mus musculus</i>                    | NP 001077429.1                                   |
|       | <i>Physcomitrella patens</i> 126981    | XP 001778952.1                                   |
|       | <i>Physcomitrella patens</i> 115757    | XP 001763679.1                                   |
|       | <i>Arabidopsis thaliana</i> SPO11-1    | NP 187923.1                                      |
|       | <i>Arabidopsis thaliana</i> SPO11-2    | NP 176582.2                                      |
|       | <i>Arabidopsis thaliana</i> SPO11-3    | NP 195902.1                                      |
|       | <i>Oryza sativa</i> SPO11-1            | AAP68363.1                                       |
|       | <i>Oryza sativa</i> SPO11-2            | NP 001061027.1                                   |
|       | <i>Oryza sativa</i> SPO11-3            | BAF65346.1                                       |
|       | <i>Oryza sativa</i> SPO11-4            | NP 001067307.1                                   |
|       | <i>Sorghum bicolor</i> SPO11-1         | XP 002466440.1                                   |
|       | <i>Sorghum bicolor</i> SPO11-2         | sorghum genome sequence,<br>conceptually spliced |
|       | <i>Sorghum bicolor</i> SPO11-3         | XP 002468055.1                                   |
|       | <i>Zea mays</i> maize SPO11-1          | EU969350.1,<br>edited                            |
|       | <i>Zea mays</i> maize SPO11-2          | ACG46441.1                                       |
|       | <i>Zea mays</i> maize SPO11-3          | NP 001141583.1                                   |

**Table S3.** PCR primers that were used to amplify sequences of meiotic recombination genes from maize and teosinte lines for polymorphism analyses.

| Gene           | Primer pair | Forward primer            | Reverse primer            |
|----------------|-------------|---------------------------|---------------------------|
| <i>Dmc1</i>    | 1           | CTCAGCACCTCAAGTACACAG     | CACTAATGCGGGAGGAGAGA      |
|                | 2           | TAATCCACCTTTGCAGTTTTGA    | AGTACCCTTGTCTTCTGCGT      |
|                | 3           | AACACTTTGCATCACAGAGGC     | GTCGGCTGGAACTTCATTAA      |
|                | 4           | GGTTGCCTACATTGACACTGA     | CCACTGAAATCAACACGGAAC     |
|                | 5           | GTTCCGTGTTGATTTCACTGG     | CCGAATCAGTCTTTTACGTCC     |
| <i>Mlh1</i>    | 1           | ACGGAGGGAGTAGTTGTTTTATAT  | CTCGACGCTAGAAAAGTGGG      |
|                | 2           | ATATTTTCGTGGTTTACCTTAA    | TATTCGTTGCCTAAAAAATCACT   |
|                | 3           | CCGCTCCTTTTTGTTTTCTACT    | ACCACGTAAGATCAATGTTCATAAA |
|                | 4           | CTTTGATGTGAAGTTCTGTTTCTG  | AATAACCTCTAAAGACCTGCAGC   |
|                | 5           | TGCTGCAGGTCTTTAGAGGTTA    | TATTTTCGAGTTTGCCTGCA      |
|                | 6           | TGCAGAGGTAAGTTATTTTTGGAA  | AGGAGTGGTTTCAGGGTTGTC     |
|                | 7           | ATTGCTATTGGTGCTAAAAGGTT   | TATAGGGTGTCTTTCTTGGCTTC   |
| <i>Mre11A</i>  | 1           | CTTCTCTCCCTTGCTGCTG       | TTTACACATTTTCACTAGTCCACAA |
|                | 2           | TGCAGCAATGTTGTTCACTTTT    | CAAAATGAAGGTCCAAAAACAA    |
|                | 3           | TTGTTTTTGGACCTTCATTTTG    | TTTTTCCTTTCTTGATGATTTTTC  |
|                | 4           | GAAAAATCATCAAGAAAGGAAAAA  | CAGGGAGCAAAATGGACACAG     |
|                | 5           | GGGTTTGCCTCCTATACTTCTTT   | CAGCCCCAGGAAAAATACAA      |
|                | 6           | TTGTATTTTTCTGGGGCTG       | TCGGCTCTTCCAACCTTACAA     |
| <i>Mre11B</i>  | 1           | TGAGGCTCGTTAATTTGTGTTT    | GCCAGTCGCAAAATCAAAC       |
|                | 2           | CACATTTTCATTCCTTTTGGG     | TAAACAGAGAAACGTGAAGGAAAC  |
|                | 3           | AGCATTTTTTGTACGTTCACTTAT  | ACCTCTTGCCCTCTTTTTAAATA   |
|                | 4           | TGTTCTGTCTTTCCGCTTTTG     | CCATATGAGCGTACCCTAGCA     |
|                | 5           | CATTCCATCTTTTTCTAGTATTGCT | TGGTGGTAGTTAATTTGTGATGC   |
|                | 6           | CCGCTGAAGAAAAAGTAGGATAT   | CAACTAATCGATCAGGGTCTCTC   |
| <i>Msh4</i>    | 1           | GGTCATTCCATTCCGTCACAT     | TCCGACGAAATAACAGCTCAC     |
|                | 2           | TGATTTGGTCATCCTTTTTTGA    | ACCGTAAAAGTTGAAATCCTGAA   |
|                | 3           | GTCATATCACCTTTTTTCTGGAAT  | GAAACGACACGCAGGTATCC      |
|                | 4           | CTGGGAATTTGAGTTGTTGATCT   | CTACGAGTAAAGACAATGGGACC   |
|                | 5           | CACAGGCCCAAGTCCATAAC      | TTATGAAATTATGAAGGGAACCAA  |
|                | 6           | CTACGAGTTCCTGGTCATGCC     | CACAGCGCTACGGATGACTAA     |
|                | 7           | TTGCTTTTTTGTGATGTCCT      | AGTTTTCGTGACCCTTCTCG      |
|                | 8           | GCTTTGAGTCTGCCATTTTTTA    | TTTAGTCATTTTCAGCTCTTCTCG  |
|                | 9           | TTGCCATGGTTAGATATCAGAATTA | AAATGATCAGCAGTTGGGTACA    |
|                | 10          | CTAAAACCCCCATTCTATTCA     | AACATTTATTAAGGGCCAGAGC    |
| <i>Mus81-1</i> | 1           | CCGCAAAATTCAAATCAGTTC     | CAGACAGTTAAGCATGAAAATCG   |
|                | 2           | TTTTCCACACCAATTATCTTTTCT  | GCAAGGTTCCCTCATAATTTTAAGA |
|                | 3           | TTGATATTTTTGTGTTGTCTTCCAG | GAAAAAGGTATTACTGTCCGAGGC  |
|                | 4           | TGATCTCTTAGTTGTGCCATGTG   | ATATGCCTCGAGATCACCAAGT    |
| <i>Rad51A1</i> | 1           | TTGCCTATTGGTGTGGTTGT      | CAAGAAGCCGGTTAGGGTTA      |
|                | 2           | AGCTCCTATGGTTGCATTTTG     | CCAACAGAACAATCAAGGAATG    |
|                | 3           | ATCCACCCTCTTTTTCCATTT     | CACCTTTGATTTCGTAAGCAGAA   |
|                | 4           | TCTGGCTGCTGTTCTGAATCT     | CCAAGGAATGACAAAGCAAAT     |
| <i>Rad51A2</i> | 1           | CAAAGCCAAAGTGAGGATGC      | AACGGGACCTAAGATATTGGC     |
|                | 2           | TTGGGGAATTTTCATGTTAGAGA   | GTGGTGCCATATCTTAGAATTTGT  |
|                | 3           | ACAAATTCTAAGATATGGCACCAC  | AAGTAACGTTTGCATGAGGACA    |
|                | 4           | CTGCTATGAAATTACCGGACAA    | ACGAGTGCAGCAGATCAGAGA     |
| <i>Recq4</i>   | 1           | CCAATCCCTTCTGTTCCCTT      | AAGTCTCGACAAATGTGCTAAGC   |
|                | 2           | ATCCCTACCTTCTCTTTTACCTACA | TAGCCCCTCAGTATAGAACAAAGAT |
|                | 3           | GGCTATTTCCGCATGTTATCT     | AGCTGCTTAGAACCCATGACC     |

|                |    |                           |                           |
|----------------|----|---------------------------|---------------------------|
|                | 4  | TTTTCCTTTGCCAATCACTGA     | TGTGGCGTGTGTCAGTAAAATAGAA |
|                | 5  | CTGTTGAGACTGTTGGAAAATGTAT | GCTCCCAATCTATATCCAGGTAAT  |
|                | 6  | TGGCGTACAGATTTTGAACAGT    | GTCCACGTCATTTTACAGTAACT   |
|                | 7  | GCACTGAAGACACATAAGGACAAT  | TGGAAACAAAAATAAATAGAAACG  |
|                | 8  | CGTTTCTATTTATTTTTGTTTCCA  | AATACAATGACAGCCACACACAA   |
|                | 9  | CCCCCCTCAAACATAACATAT     | CTCATTTCTTCAACGTGTCTG     |
|                | 10 | TTGTTGCACCTTGTCATTCTG     | AACCCTTGACATCACTGCATC     |
| <i>Spo11-1</i> | 1  | TTGTTAATTTTTGTCTTGAGAGGA  | CCCTCAGGAGCACATCTACG      |
|                | 2  | CGTCCTCTCTCTGCTCCACA      | AGCACACAGGATGATTAAGGAAC   |
|                | 3  | TTTGCTAGGTTTGGCGATGTTATA  | AAGAGCAAAAAATGATCAGTGACT  |
|                | 4  | GCATTATAGTGAGCTGAAGTTGTCT | GCATAGCAGCATCAGATAAATCA   |
|                | 5  | TGCTACTTGCGTAATTTCAATTCT  | ACTCTATGACACATCCTGGACG    |
| <i>Spo11-2</i> | 1  | ACGCAGACCACTACTGGACTC     | GAGGAAGTTGAGCACCGCTAC     |
|                | 2  | GTACACCAGTTGCCAAACCTC     | ATAATTCCGTCCCAGGGTACT     |
|                | 3  | TATCCTCGCCCATTTGTCTG      | ATGCTTGAAATGGAGGTACACA    |
|                | 4  | TTGCATCCAAATTCCTTATGATAA  | TCGTCAGATGTAATCGCCCT      |

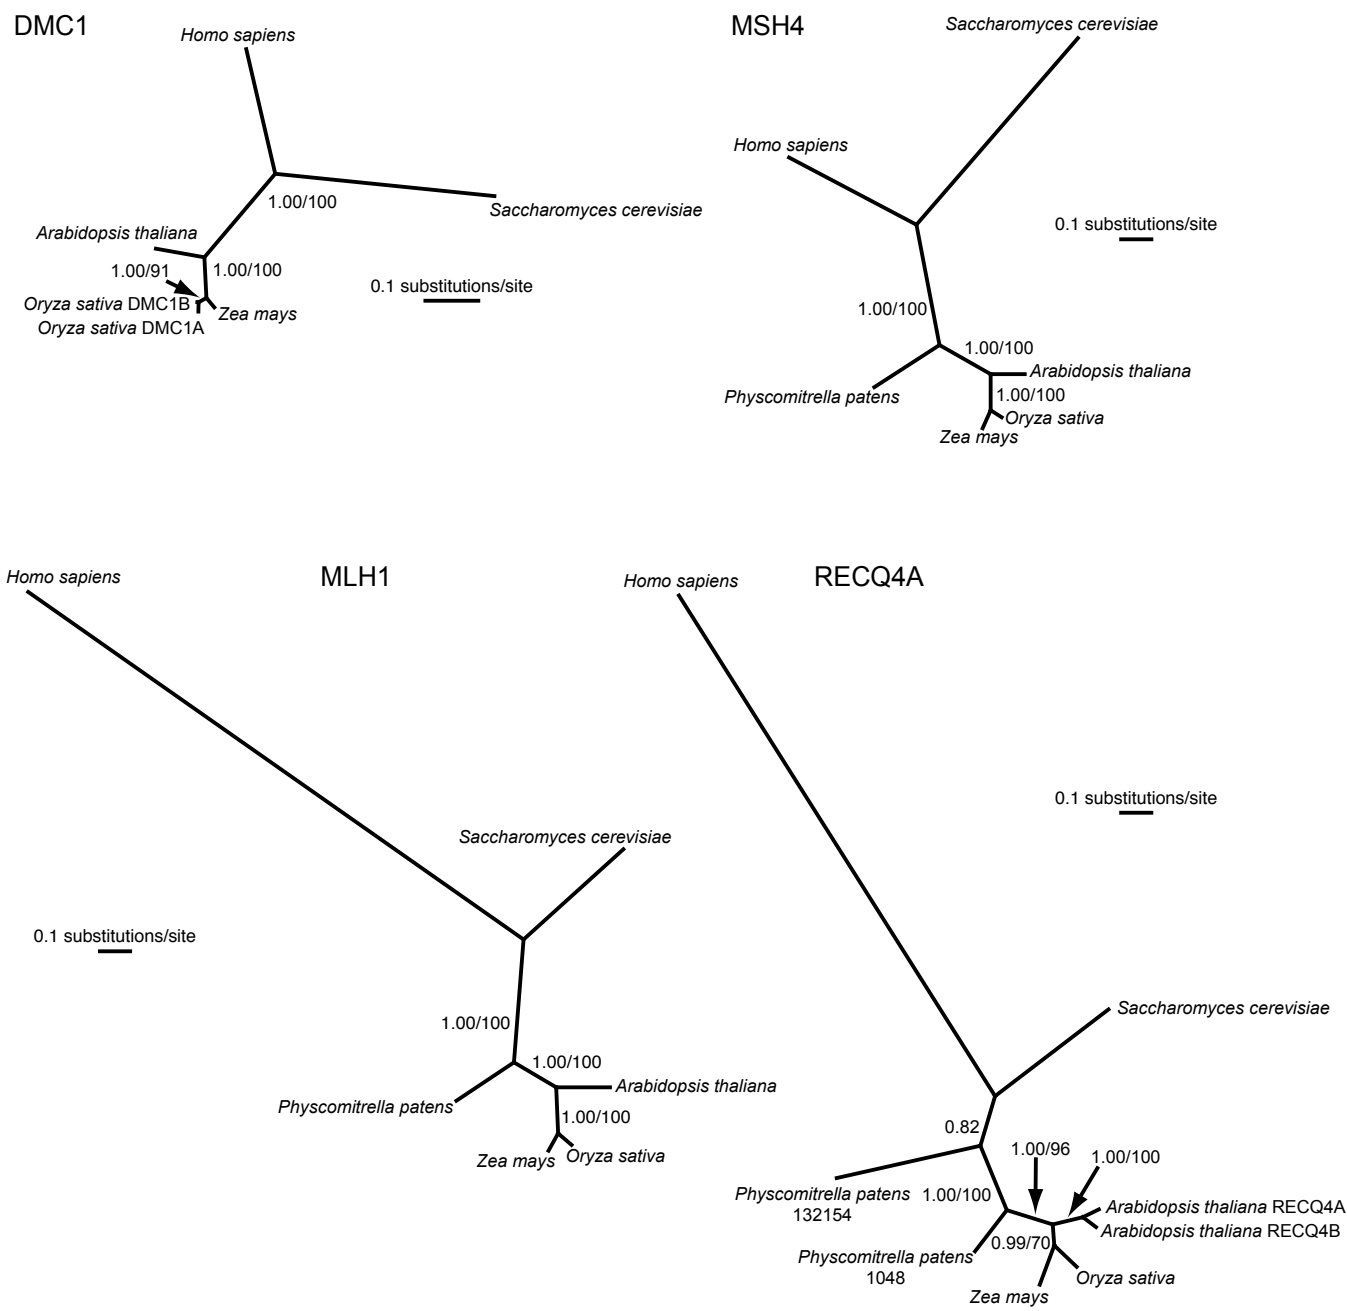

**Figure S1.** Phylogeny reconstructions of the DMC1, MLH1, MSH4, and RECQ4 proteins in eukaryotes based on the Bayesian and maximum parsimony methods. The Bayesian and the maximum parsimony trees were identical for all proteins. Numbers next to branches are posterior probabilities and bootstrap support values. Only posterior probability values of 0.8 and higher and bootstrap support values of 70% and higher are reported. Accession numbers for sequences from GenBank used in this analysis are listed in Table S2.

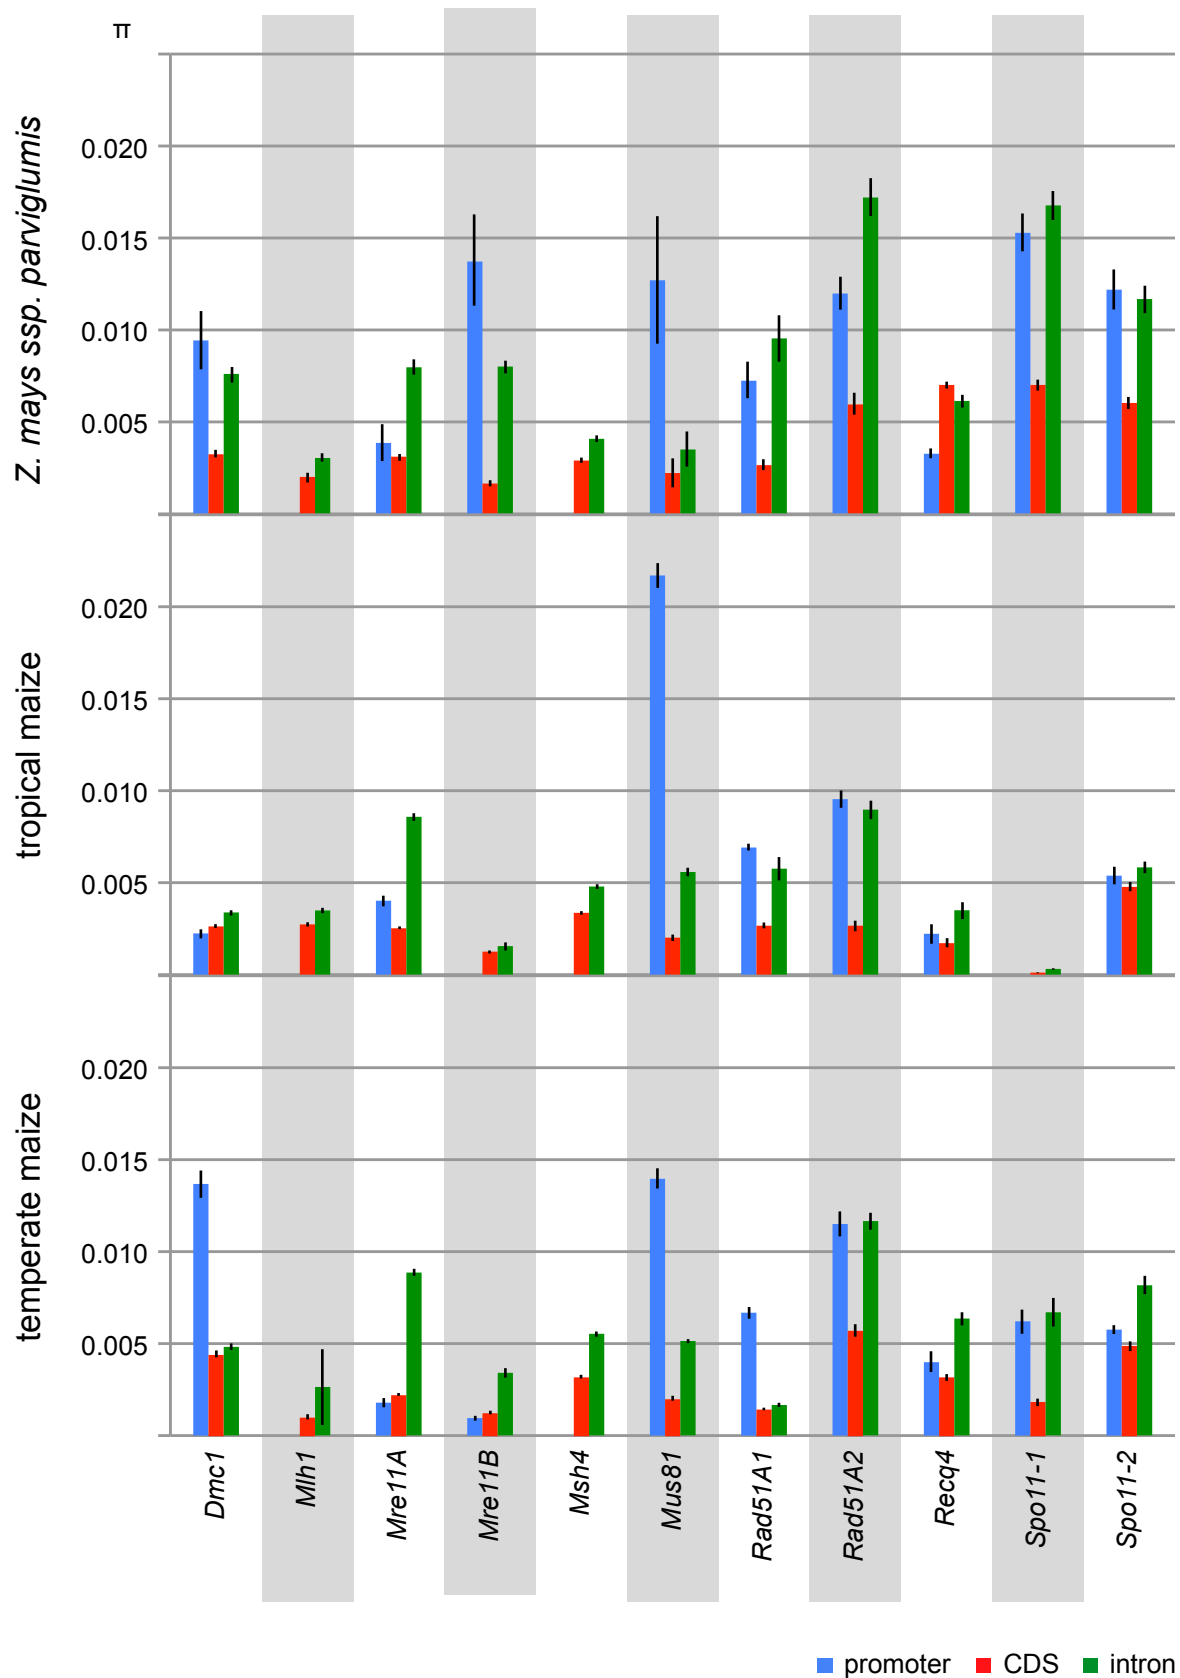

**Figure S2.** Comparison of nucleotide sequence diversity rates ( $\pi$ ) in the promoter, coding, and intron regions of meiotic recombination genes in *Z. mays ssp. parviglumis* and in tropical and temperate maize hybrids. Black bars indicate standard error.
